# Supplementary material for: Stent fixation could reduce the stent migration rate: a comprehensive systematic review and meta-analysis
Source: Research Square preprint supplement (doi:10.21203/rs.3.rs-7457023/v1), 2025-09-09
Supplement: Supplementary file 1 [file dc2d00fccabcf3986ca533a6.docx]

**
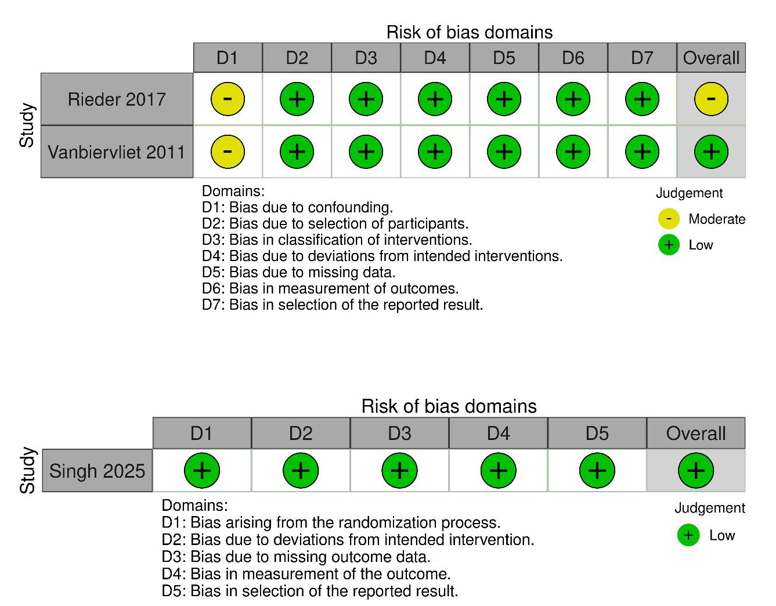
**

**Figure S1**. Quality of the included clinical trials


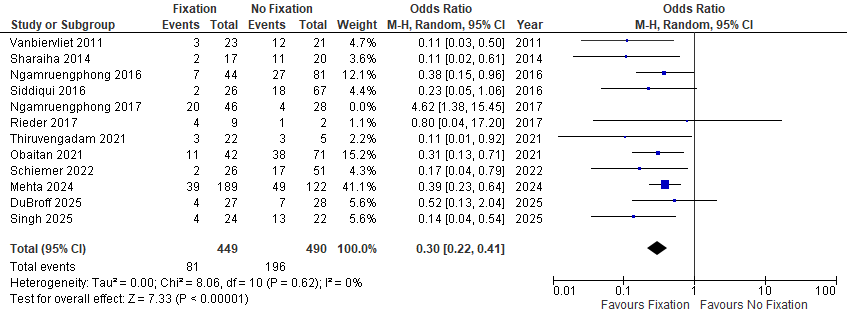


**Figure S2**. Leave one out for stent migration.


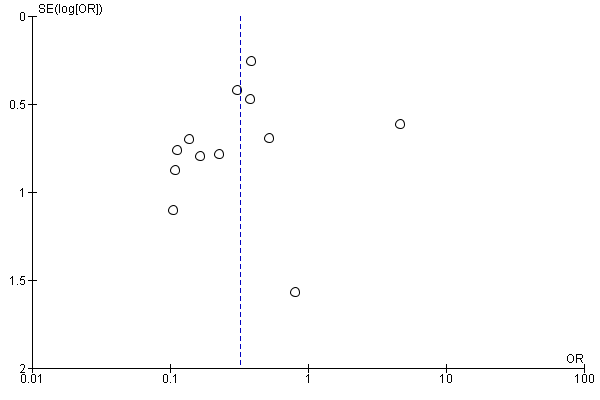


**Figure S3**. Funnel plot for stent migration


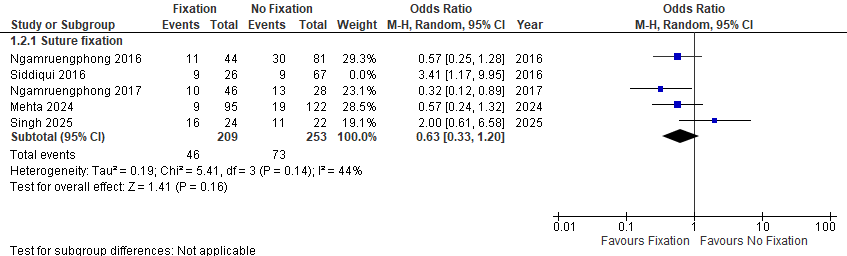


**Figure S4**. leave one out for Adverse events for suture fixation

**Table S1**. Search Strategy

| PubMed (n = 862) | stent[Title/Abstract] AND fixation[Title/Abstract] |
| --- | --- |
| Scopus (n =1514) | TITLE-ABS-KEY (Stent AND fixation) |
| Web Of Science (n = 1207) | Stent AND fixation (Topic) |

Representing the search strategy used in each database, along with the number of records exported in each.

**Table S2**. quality of the included cohort studies

| ***Study ID*** | ***Case Definition Adequate*** | ***Representativeness of Exposed Cohort*** | ***Selection of Non-Exposed Cohort*** | ***Ascertainment of Exposure*** | ***Outcome Not Present at Start*** | ***Overall Selection*** | ***Comparability*** | ***Ascertainment of Outcome*** | ***Same Method for Cases and Controls*** | ***Follow-up Adequacy*** | ***Overall Outcome*** | ***Overall*** |
| --- | --- | --- | --- | --- | --- | --- | --- | --- | --- | --- | --- | --- |
| *DuBroff 2025* | *0* | *1* | *1* | *1* | *1* | *3* | *1* | *1* | *1* | *1* | *3* | *7* |
| *Mehta 2024* | *1* | *1* | *1* | *1* | *1* | *4* | *2* | *1* | *1* | *1* | *3* | *9* |
| *Ngamruengphi* | *1* | *1* | *1* | *1* | *1* | *4* | *1* | *1* | *1* | *1* | *3* | *8* |
| *Ngamruengpho* | *1* | *1* | *1* | *1* | *1* | *4* | *2* | *1* | *1* | *1* | *3* | *9* |
| *Obaitan 2021* | *0* | *1* | *1* | *1* | *1* | *3* | *1* | *1* | *0* | *1* | *2* | *7* |
| *Schiemer 2022* | *0* | *1* | *1* | *1* | *1* | *3* | *1* | *1* | *0* | *1* | *2* | *6* |
| *Sharaiha 2014* | *1* | *1* | *1* | *1* | *1* | *4* | *1* | *1* | *0* | *1* | *2* | *7* |
| *Siddiqui 2016* | *1* | *1* | *1* | *1* | *1* | *4* | *2* | *1* | *1* | *1* | *3* | *9* |
| *Thiruvengadam* | *1* | *1* | *1* | *1* | *1* | *4* | *1* | *1* | *0* | *1* | *2* | *7* |

The Newcastle Ottawa scale (NOS) was utilized to assess the quality of observational studies included. Assessment was conducted across multiple domains: potential bias arising from the study participants' selection, the groups' comparability, and the ascertainment of the outcome
